# Supplementary material
Source: publisher figshare collection journal article supplement (https://geolsoc.figshare.com/ndownloader/files/5423093)
Supplement: Supplementary file 1 [file 5423093]

Table 2
LA-MC-ICPMS Zircon Lu-Hf isotope data
	176Yb/177Hf a	�2s	176Lu/177Hf a	�2s	178Hf/177Hf	180Hf/177Hf	SigHf b	176Hf/177Hf	�2s c	176Hf/177Hf(t)d	eHf(t) d	�2s c	TNC e	Age f	�2s	Conc.
							(V)						(Ga)	(Ma)		%
Sample RACHEL-1
A154	0.0273	24	0.00089	6	1.46720	1.88651	14	0.282520	18	0.282508	6.9	0.6	1.13	746	11	101
A155	0.0198	17	0.00067	4	1.46716	1.88666	15	0.282431	17	0.282423	1.3	0.6	1.34	634	9	101
A156	0.0180	15	0.00061	4	1.46722	1.88642	15	0.281927	17	0.281916	-8.5	0.6	2.18	997	19	105
A157	0.0327	27	0.00108	7	1.46718	1.88669	14	0.282293	18	0.282281	-4.5	0.6	1.63	597	11	97
A158	0.0125	13	0.00034	3	1.46717	1.88664	15	0.282240	16	0.282237	-6.0	0.6	1.72	600	11	101
A159	0.0195	19	0.00060	5	1.46716	1.88673	15	0.280989	22	0.280959	-5.5	0.8	3.33	2599	15	96
A160	0.0125	12	0.00036	2	1.46720	1.88660	14	0.282249	16	0.282245	-5.9	0.5	1.70	594	8	98
A161	0.0435	40	0.00135	9	1.46721	1.88652	15	0.281506	16	0.281457	-3.9	0.6	2.67	1908	19	101
A162	0.0103	10	0.00029	2	1.46722	1.88652	16	0.282540	18	0.282535	8.6	0.6	1.06	780	13	89
A163	0.0144	13	0.00041	3	1.46722	1.88648	14	0.282437	18	0.282432	1.7	0.6	1.32	633	13	93
A164	0.0579	55	0.00183	17	1.46718	1.88684	14	0.282606	21	0.282584	7.4	0.7	1.02	649	7	98
A165	0.0085	11	0.00024	3	1.46721	1.88654	12	0.282168	23	0.282166	-9.7	0.8	1.87	547	9	100
A166	0.0145	14	0.00039	3	1.46721	1.88666	16	0.282267	17	0.282263	-6.1	0.6	1.68	554	9	78
A167	0.0216	34	0.00080	11	1.46726	1.88629	20	0.282528	17	0.282515	10.1	0.6	1.06	876	17	100
A168	0.0175	19	0.00056	5	1.46721	1.88653	20	0.282639	24	0.282631	9.7	0.9	0.91	678	9	98
A169	0.0289	29	0.00098	8	1.46717	1.88656	9	0.281670	26	0.281654	-21.0	0.9	2.74	850	10	106
A170	0.0153	13	0.00046	3	1.46718	1.88670	17	0.282170	16	0.282165	-8.7	0.6	1.86	594	7	100
A171	0.0156	13	0.00050	3	1.46720	1.88659	19	0.282529	16	0.282521	8.7	0.6	1.07	808	10	99
A172	0.0172	30	0.00038	2	1.46716	1.88668	11	0.282507	30	0.282502	5.7	1.0	1.16	703	9	100
A173	0.0439	41	0.00137	9	1.46720	1.88655	20	0.281465	15	0.281411	-1.3	0.5	2.68	2090	42	96
A174	0.0148	14	0.00048	4	1.46719	1.88661	19	0.281852	13	0.281842	-10.3	0.5	2.30	1031	13	100
A175	0.0374	41	0.00078	8	1.46719	1.88671	2	0.281970	113	0.281959	-12.5	4.0	2.19	750	12	100
A176	0.0176	14	0.00061	4	1.46722	1.88648	20	0.282325	18	0.282318	-2.2	0.7	1.54	640	6	102
A177	0.0565	106	0.00170	31	1.46719	1.88655	17	0.282583	17	0.282563	5.9	0.6	1.07	616	8	101
A178	0.0213	20	0.00069	5	1.46727	1.88624	9	0.281434	19	0.281409	-5.7	0.7	2.77	1904	30	101
A179	0.0244	20	0.00074	5	1.46723	1.88654	16	0.282041	16	0.282030	-8.5	0.6	2.03	817	12	103
A180	0.0181	16	0.00054	4	1.46717	1.88667	10	0.281472	35	0.281453	-7.4	1.2	2.75	1761	35	101
A182	0.0258	22	0.00094	6	1.46717	1.88671	15	0.282472	39	0.282457	7.4	1.4	1.18	848	12	100
A183	0.0637	66	0.00202	18	1.46721	1.88663	14	0.282429	22	0.282393	7.1	0.8	1.27	935	13	101
A184	0.0202	17	0.00066	4	1.46711	1.88697	25	0.281426	22	0.281401	-4.5	0.8	2.76	1967	16	99
A185	0.0249	23	0.00085	7	1.46721	1.88649	19	0.282546	16	0.282532	10.2	0.6	1.03	856	12	99
A186	0.0140	17	0.00054	7	1.46720	1.88668	13	0.282452	18	0.282442	8.1	0.7	1.19	902	10	102
A187	0.0147	13	0.00047	3	1.46721	1.88664	18	0.281671	16	0.281662	-16.6	0.5	2.65	1033	15	102
A189	0.0193	16	0.00058	4	1.46718	1.88673	15	0.282447	16	0.282440	1.0	0.6	1.32	591	9	99
A190	0.0284	25	0.00097	7	1.46719	1.88674	11	0.282500	21	0.282483	9.5	0.7	1.11	902	15	101
A191	0.0193	19	0.00058	4	1.46724	1.88633	18	0.282244	16	0.282237	-4.3	0.6	1.69	677	11	101
A192	0.0193	16	0.00060	4	1.46716	1.88679	18	0.282557	13	0.282549	6.6	0.5	1.08	668	9	101
A193	0.0200	18	0.00058	4	1.46724	1.88645	22	0.281291	25	0.281263	4.2	0.9	2.75	2555	35	103
A199	0.0184	15	0.00057	4	1.46718	1.88665	15	0.282294	14	0.282287	-3.8	0.5	1.61	621	8	95
A200	0.0148	17	0.00039	2	1.46727	1.88638	15	0.282155	26	0.282148	-0.3	0.9	1.73	991	54	99
A201	0.0122	10	0.00038	3	1.46717	1.88674	16	0.282287	18	0.282283	-3.7	0.6	1.61	632	9	91
A202	0.0155	14	0.00049	4	1.46722	1.88658	17	0.282416	15	0.282410	1.0	0.5	1.36	640	9	101
A203	0.0304	44	0.00095	12	1.46716	1.88670	16	0.282462	16	0.282450	3.9	0.6	1.26	705	8	100
A204	0.0414	36	0.00130	10	1.46723	1.88652	17	0.281134	14	0.281082	-13.4	0.5	3.33	2073	30	101
A205	0.0547	47	0.00086	5	1.46713	1.88694	2	0.281727	112	0.281716	-22.3	4.0	2.68	697	11	99
A206	0.0248	20	0.00078	5	1.46720	1.88661	19	0.282660	17	0.282650	10.3	0.6	0.88	673	10	98
A207	0.0172	14	0.00058	4	1.46715	1.88681	20	0.281415	16	0.281393	-3.1	0.6	2.74	2041	28	100
A208	0.0282	34	0.00077	8	1.46722	1.88663	8	0.282071	199	0.282062	-12.1	7.0	2.05	606	9	99
A209	0.0492	94	0.00146	23	1.46713	1.88684	16	0.282641	14	0.282626	7.1	0.5	0.97	573	9	101
A210	0.0635	57	0.00203	15	1.46717	1.88657	12	0.281957	22	0.281925	-11.6	0.8	2.22	844	15	100
A211	0.0651	182	0.00077	21	1.46722	1.88662	8	0.281824	133	0.281813	-17.7	4.7	2.47	747	12	98
A212	0.0222	19	0.00077	5	1.46723	1.88645	15	0.281526	15	0.281510	-21.7	0.5	2.93	1047	16	105
A213	0.0216	17	0.00071	4	1.46719	1.88657	14	0.282598	17	0.282590	6.6	0.6	1.03	604	8	99
A214	0.0310	25	0.00098	6	1.46716	1.88675	17	0.282678	14	0.282664	12.4	0.5	0.82	748	9	98
A215	0.0297	31	0.00086	7	1.46719	1.88662	15	0.282290	19	0.282279	-2.4	0.7	1.60	694	10	99
A216	0.0488	48	0.00165	15	1.46720	1.88657	16	0.282096	22	0.282072	-8.2	0.8	1.97	760	9	99
A217	0.0300	26	0.00095	6	1.46724	1.88635	15	0.281869	18	0.281858	-18.7	0.6	2.43	634	11	106
A218	0.0265	27	0.00087	7	1.46720	1.88656	15	0.282568	18	0.282557	7.4	0.6	1.05	692	8	90
A219	0.0332	33	0.00096	8	1.46721	1.88649	22	0.282209	19	0.282196	-5.2	0.7	1.75	698	10	97
A220	0.0833	119	0.00199	27	1.46721	1.88652	22	0.282245	23	0.282235	-13.4	0.8	1.85	275	10	33
A221	0.0378	34	0.00125	9	1.46716	1.88675	16	0.282647	16	0.282632	8.6	0.6	0.93	629	10	99
A222	0.0193	16	0.00068	4	1.46723	1.88661	20	0.282516	15	0.282505	9.5	0.5	1.08	867	13	103
A223	0.0185	16	0.00058	4	1.46715	1.88679	19	0.282315	19	0.282303	7.4	0.7	1.38	1090	13	101
A224	0.0268	22	0.00089	6	1.46720	1.88651	18	0.282082	16	0.282066	-3.3	0.6	1.89	988	47	93
A225	0.0317	29	0.00114	8	1.46718	1.88661	22	0.282532	14	0.282516	6.8	0.5	1.12	730	9	95
A228	0.0207	17	0.00063	4	1.46723	1.88662	19	0.282260	17	0.282247	5.8	0.6	1.48	1105	13	101
A229	0.0288	46	0.00096	14	1.46720	1.88654	12	0.282493	18	0.282479	6.9	0.7	1.16	794	9	106
A230	0.0103	10	0.00030	2	1.46718	1.88667	17	0.282001	16	0.281998	-14.0	0.6	2.17	622	7	100
A231	0.0259	53	0.00081	17	1.46719	1.88671	22	0.282122	18	0.282112	-8.5	0.6	1.92	688	12	100
A233	0.0100	9	0.00036	3	1.46719	1.88665	24	0.282512	15	0.282507	9.1	0.5	1.09	844	16	99
A243	0.0502	54	0.00105	19	1.46719	1.88698	7	0.282347	54	0.282331	1.9	1.9	1.45	805	12	98
A245	0.0356	32	0.00115	9	1.46720	1.88663	16	0.282108	18	0.282087	-3.2	0.6	1.86	960	68	99
A246	0.0252	28	0.00075	6	1.46720	1.88667	16	0.282233	17	0.282224	-5.6	0.6	1.73	637	12	92
A247	0.0135	14	0.00042	3	1.46717	1.88676	18	0.281467	18	0.281460	-25.7	0.6	3.07	949	10	104
A248	0.0079	10	0.00026	3	1.46716	1.88675	19	0.281139	15	0.281126	-1.1	0.6	3.03	2532	65	90
A249	0.0185	19	0.00053	4	1.46723	1.88654	18	0.282571	19	0.282564	8.4	0.7	1.03	725	9	100
A250	0.0233	19	0.00075	5	1.46719	1.88678	17	0.282529	14	0.282518	8.2	0.5	1.09	787	11	100
A251	0.0192	30	0.00051	4	1.46717	1.88671	19	0.282181	19	0.282175	-8.9	0.7	1.85	568	8	99
A252	0.0154	18	0.00051	5	1.46714	1.88692	13	0.282635	29	0.282630	7.3	1.0	0.96	572	16	89
A253	0.0764	63	0.00233	14	1.46719	1.88670	11	0.283151	21	0.283149	13.6	0.7	0.17	31	1	9
A254	0.0396	45	0.00107	13	1.46715	1.88691	12	0.282274	43	0.282257	-0.7	1.5	1.59	801	8	92
A255	0.0522	59	0.00146	13	1.46722	1.88667	19	0.282089	19	0.282069	-9.2	0.7	1.99	720	10	105
A256	0.0131	11	0.00040	2	1.46718	1.88667	18	0.282191	13	0.282186	-7.3	0.5	1.80	624	9	92
A257	0.0190	15	0.00058	4	1.46720	1.88658	19	0.282517	17	0.282511	3.0	0.6	1.20	569	7	98
A259	0.0242	21	0.00075	5	1.46722	1.88669	16	0.282339	18	0.282323	8.5	0.6	1.33	1105	14	100
A260	0.0228	25	0.00068	6	1.46720	1.88661	18	0.281782	19	0.281772	-18.3	0.7	2.54	785	10	91
A262	0.0398	37	0.00135	10	1.46725	1.88632	9	0.281842	26	0.281814	-9.9	0.9	2.33	1092	50	98
A264	0.0197	28	0.00063	9	1.46721	1.88658	16	0.282572	14	0.282565	6.0	0.5	1.07	618	8	86
A265	0.0220	20	0.00070	5	1.46717	1.88676	17	0.282404	14	0.282396	0.4	0.5	1.39	636	9	99
A268	0.0039	4	0.00009	1	1.46721	1.88663	20	0.281938	15	0.281937	-16.1	0.5	2.28	622	9	99
A269	0.0159	15	0.00048	3	1.46719	1.88664	15	0.282529	16	0.282523	4.7	0.6	1.15	625	7	98
A270	0.0683	60	0.00187	12	1.46722	1.88647	13	0.282548	34	0.282534	0.1	1.2	1.22	405	6	99
A271	0.0389	46	0.00128	14	1.46717	1.88671	16	0.282575	21	0.282562	4.9	0.7	1.10	573	8	93
A272	0.0167	15	0.00057	4	1.46722	1.88646	21	0.282655	22	0.282648	10.4	0.8	0.88	681	10	99
A273	0.0120	11	0.00036	3	1.46719	1.88670	18	0.282473	18	0.282469	2.1	0.6	1.27	596	8	104
A274	0.0259	30	0.00090	9	1.46720	1.88659	20	0.281202	23	0.281155	4.7	0.8	2.88	2740	13	95
A280	0.0227	18	0.00076	5	1.46719	1.88668	12	0.282241	18	0.282203	39.3	0.7	0.83	2624	11	100
Sample 15-30
A05	0.0344	35	0.00115	10	1.46718	1.88641	16	0.282707	128	0.282694	10.5	4.5	0.82	617	16	96
A06	0.0226	25	0.00075	7	1.46724	1.88629	16	0.282558	15	0.282547	9.1	0.5	1.03	782	13	106
A07	0.0211	22	0.00076	6	1.46720	1.88680	10	0.282588	29	0.282579	6.8	1.0	1.04	630	13	104
A08	0.0115	14	0.00040	4	1.46716	1.88684	17	0.282117	20	0.282108	0.2	0.7	1.77	1078	37	98
A09	0.0164	16	0.00058	4	1.46714	1.88684	22	0.282430	13	0.282419	8.8	0.5	1.20	970	33	102
A10	0.0405	50	0.00130	15	1.46712	1.88713	20	0.282106	186	0.282089	-9.0	6.6	1.96	703	15	98
A11	0.0139	12	0.00043	3	1.46722	1.88645	18	0.282081	18	0.282074	-3.7	0.6	1.89	958	17	101
A12	0.0154	13	0.00046	3	1.46718	1.88667	17	0.282622	16	0.282617	7.7	0.6	0.97	612	11	86
A13	0.0409	39	0.00136	10	1.46718	1.88664	19	0.281510	15	0.281458	-1.9	0.5	2.63	1990	20	98
A14	0.0160	14	0.00051	3	1.46719	1.88667	16	0.281852	16	0.281842	-9.0	0.6	2.28	1087	38	100
A15	0.0193	16	0.00066	4	1.46720	1.88660	17	0.282638	17	0.282629	11.8	0.6	0.88	774	19	91
A16	0.0154	13	0.00055	3	1.46721	1.88654	18	0.281292	18	0.281286	-40.9	0.7	3.55	544	22	27
A18	0.0255	21	0.00099	7	1.46722	1.88641	17	0.282557	14	0.282544	7.2	0.5	1.07	704	12	103
A19	0.0620	56	0.00191	13	1.46719	1.88652	17	0.282711	15	0.282696	6.1	0.5	0.90	417	9	23
A20	0.0310	25	0.00094	6	1.46721	1.88650	15	0.282201	17	0.282190	-7.8	0.6	1.81	593	12	88
A21	0.0444	37	0.00118	8	1.46717	1.88671	16	0.282555	15	0.282551	-4.2	0.5	1.27	185	3	62
A22	0.0146	12	0.00046	3	1.46716	1.88659	23	0.281930	13	0.281922	-10.4	0.4	2.20	901	22	89
A23	0.0083	8	0.00027	2	1.46721	1.88654	19	0.280972	17	0.280958	-6.8	0.6	3.35	2546	17	95
A24	0.0305	24	0.00096	6	1.46717	1.88671	12	0.282547	19	0.282535	5.6	0.7	1.12	645	13	96
A25	0.0267	21	0.00084	5	1.46718	1.88665	14	0.282255	19	0.282241	-0.1	0.7	1.60	854	13	99
A26	0.0386	33	0.00125	9	1.46723	1.88646	15	0.282660	17	0.282642	11.5	0.6	0.87	740	14	104
A27	0.0122	39	0.00030	10	1.46717	1.88663	21	0.282185	14	0.282180	-2.1	0.5	1.72	861	17	106
A28	0.0404	34	0.00121	8	1.46727	1.88638	11	0.282503	18	0.282486	6.3	0.6	1.17	754	12	101
A29	0.0425	36	0.00138	9	1.46719	1.88659	16	0.281898	18	0.281871	-9.5	0.7	2.25	1021	49	93
A30	0.0132	11	0.00045	3	1.46717	1.88663	20	0.282581	16	0.282575	8.0	0.6	1.02	692	13	96
A35	0.0595	53	0.00208	15	1.46724	1.88629	17	0.282615	16	0.282588	8.5	0.6	0.99	694	14	93
A36	0.0115	12	0.00038	3	1.46718	1.88661	20	0.281820	17	0.281815	-18.3	0.6	2.48	716	12	105
A37	0.0200	16	0.00068	4	1.46716	1.88679	18	0.282511	15	0.282500	9.1	0.5	1.09	858	15	101
A38	0.0160	25	0.00057	8	1.46717	1.88669	11	0.281575	19	0.281553	3.2	0.7	2.41	2070	42	95
A39	0.0148	12	0.00049	3	1.46722	1.88648	16	0.282204	17	0.282199	-7.3	0.6	1.79	601	11	93
A40	0.0221	18	0.00071	4	1.46721	1.88647	17	0.281983	16	0.281969	-5.2	0.6	2.05	1055	81	96
A41	0.0335	29	0.00096	7	1.46719	1.88665	13	0.282675	18	0.282667	5.4	0.6	0.95	430	10	100
A42	0.0126	18	0.00035	4	1.46720	1.88654	17	0.282543	15	0.282539	5.8	0.5	1.11	650	11	86
A43	0.0140	13	0.00050	4	1.46722	1.88651	18	0.281074	15	0.281049	-1.9	0.5	3.14	2618	15	99
A44	0.0154	13	0.00047	3	1.46719	1.88657	18	0.282615	15	0.282608	11.3	0.5	0.91	786	14	96
A45	0.0169	14	0.00051	3	1.46714	1.88676	16	0.282106	17	0.282096	0.0	0.6	1.79	1088	40	98
A46	0.0295	40	0.00082	10	1.46723	1.88643	16	0.282564	15	0.282553	7.3	0.5	1.06	692	13	94
A47	0.0195	17	0.00054	3	1.46718	1.88665	20	0.281424	15	0.281405	-6.8	0.5	2.80	1862	27	98
A48	0.0080	7	0.00025	2	1.46721	1.88654	13	0.282193	15	0.282190	-7.8	0.5	1.81	595	12	90
A49	0.0135	11	0.00047	3	1.46722	1.88646	20	0.281469	15	0.281453	-4.9	0.5	2.70	1871	44	89
A50	0.0129	20	0.00039	3	1.46717	1.88668	17	0.281708	16	0.281701	-18.3	0.6	2.63	897	16	93
A51	0.0142	12	0.00043	3	1.46721	1.88656	17	0.282430	13	0.282424	1.8	0.5	1.33	651	11	98
A52	0.0228	19	0.00074	5	1.46720	1.88677	15	0.282494	18	0.282485	4.1	0.6	1.21	660	11	97
A53	0.0100	9	0.00031	2	1.46722	1.88652	13	0.282224	15	0.282220	-5.9	0.5	1.73	633	10	98
A54	0.0219	18	0.00069	4	1.46717	1.88670	22	0.282048	12	0.282035	-3.8	0.4	1.94	1016	16	103
A55	0.0125	12	0.00038	4	1.46718	1.88672	26	0.282001	42	0.281986	17.1	1.5	1.59	2001	104	101
A56	0.0144	14	0.00043	3	1.46717	1.88664	15	0.282110	18	0.282105	-10.3	0.6	1.96	616	13	101
A57	0.0229	20	0.00073	5	1.46712	1.88672	19	0.282018	16	0.282003	-3.3	0.6	1.97	1089	116	99
A58	0.0183	15	0.00061	4	1.46718	1.88656	21	0.281579	15	0.281568	-20.2	0.5	2.83	1023	40	99
A59	0.0286	24	0.00089	6	1.46723	1.88660	13	0.282530	19	0.282519	5.0	0.7	1.15	647	11	103
A60	0.0157	13	0.00050	4	1.46721	1.88650	19	0.281487	18	0.281468	-0.6	0.6	2.60	2034	17	96
A61	0.0304	27	0.00087	6	1.46721	1.88651	20	0.281017	37	0.280973	-4.8	1.3	3.30	2611	17	102
A62	0.0187	17	0.00060	4	1.46717	1.88667	17	0.281822	15	0.281811	-12.5	0.5	2.38	983	43	100
A63	0.0221	18	0.00069	5	1.46726	1.88635	18	0.282039	17	0.282027	-5.5	0.6	1.98	951	22	99
A64	0.0364	30	0.00107	7	1.46714	1.88699	16	0.282396	25	0.282381	3.0	0.9	1.36	772	16	98
A65	0.0426	62	0.00137	18	1.46715	1.88676	18	0.282381	19	0.282365	-0.6	0.7	1.45	638	12	100
A66	0.0230	28	0.00069	7	1.46718	1.88662	18	0.282531	17	0.282523	4.3	0.6	1.16	609	12	95
A72	0.0369	31	0.00139	9	1.46723	1.88649	20	0.282531	16	0.282512	6.6	0.6	1.13	729	15	91
A73	0.0247	21	0.00087	6	1.46721	1.88644	17	0.282496	15	0.282483	8.2	0.5	1.14	843	14	95
A74	0.0201	17	0.00061	4	1.46722	1.88654	15	0.282165	19	0.282158	-9.1	0.7	1.87	587	12	91
A75	0.0177	15	0.00059	4	1.46720	1.88663	17	0.282558	15	0.282551	5.6	0.5	1.10	619	11	97
A76	0.0132	11	0.00043	3	1.46725	1.88656	18	0.281866	17	0.281859	-12.1	0.6	2.31	924	19	95
A77	0.0498	42	0.00165	11	1.46707	1.88703	13	0.282676	20	0.282650	13.6	0.7	0.81	819	36	89
A79	0.0239	25	0.00073	5	1.46721	1.88660	18	0.281232	14	0.281199	-1.4	0.5	2.95	2409	16	84
A80	0.0269	23	0.00090	6	1.46725	1.88650	13	0.282647	18	0.282635	10.9	0.6	0.89	727	13	100
A81	0.0245	25	0.00080	7	1.46713	1.88688	13	0.282586	19	0.282577	6.8	0.7	1.04	632	11	100
A82	0.0170	14	0.00059	4	1.46719	1.88653	14	0.282542	19	0.282533	8.6	0.7	1.06	782	13	101
A84	0.0252	28	0.00083	8	1.46712	1.88683	17	0.282641	13	0.282630	10.1	0.4	0.91	699	13	97
A85	0.0139	16	0.00045	5	1.46726	1.88653	12	0.281826	18	0.281821	-20.8	0.6	2.52	596	11	95
A89	0.0331	29	0.00103	7	1.46726	1.88636	13	0.281292	27	0.281253	-9.0	1.0	3.03	2002	28	99
A90	0.0528	45	0.00161	11	1.46719	1.88660	13	0.282414	19	0.282395	0.5	0.7	1.39	640	13	98
A091	0.0324	26	0.00097	6	1.46722	1.88669	21	0.281847	15	0.281827	-10.1	0.5	2.32	1063	22	93
A92	0.0203	17	0.00075	5	1.46719	1.88664	18	0.282490	15	0.282478	8.9	0.5	1.13	885	16	108
A93	0.0208	31	0.00066	9	1.46725	1.88632	18	0.282583	16	0.282573	10.7	0.6	0.97	813	15	97
A95	0.0279	27	0.00093	7	1.46719	1.88656	14	0.282496	28	0.282481	8.6	1.0	1.13	864	15	103
A119	0.0276	22	0.00082	5	1.46720	1.88655	25	0.282131	16	0.282122	-9.5	0.6	1.93	627	14	101
A120	0.0293	31	0.00087	7	1.46726	1.88632	16	0.282600	14	0.282589	8.6	0.5	0.99	697	14	92
A121	0.0112	9	0.00036	2	1.46722	1.88642	14	0.282418	132	0.282412	5.9	4.7	1.27	853	17	101
A123	0.0219	18	0.00068	4	1.46717	1.88673	17	0.282379	16	0.282366	8.2	0.6	1.29	1026	19	103
A127	0.0635	52	0.00235	14	1.46723	1.88652	19	0.282664	24	0.282631	10.9	0.8	0.89	732	13	107
A128	0.0150	13	0.00050	3	1.46720	1.88660	19	0.282546	15	0.282539	9.3	0.5	1.04	804	17	100
A129	0.0280	33	0.00094	10	1.46715	1.88681	15	0.281606	16	0.281572	0.1	0.6	2.45	1902	43	101
A131	0.0347	51	0.00104	14	1.46718	1.88661	20	0.282459	14	0.282446	3.2	0.5	1.28	678	13	91
A132	0.0355	33	0.00117	8	1.46719	1.88661	20	0.282605	16	0.282591	7.1	0.6	1.02	624	11	102
A133	0.0432	59	0.00129	16	1.46721	1.88652	17	0.282265	15	0.282251	-5.8	0.5	1.69	589	13	99
A134	0.0542	46	0.00181	11	1.46724	1.88643	18	0.282350	24	0.282314	7.0	0.8	1.38	1053	43	100
A136	0.0610	50	0.00177	11	1.46717	1.88674	15	0.282748	16	0.282733	8.0	0.6	0.81	443	7	98
A137	0.0281	24	0.00077	6	1.46721	1.88652	14	0.282413	15	0.282404	0.3	0.5	1.38	618	12	95
A138	0.0252	21	0.00073	5	1.46721	1.88663	14	0.282293	17	0.282279	5.8	0.6	1.44	1058	45	100
A139	0.0097	10	0.00037	3	1.46719	1.88660	27	0.282788	17	0.282784	13.9	0.6	0.64	623	12	71
A141	0.0513	42	0.00163	10	1.46719	1.88660	15	0.282650	18	0.282627	10.9	0.7	0.90	740	14	96
A152	0.1431	139	0.00438	38	1.46724	1.88657	12	0.282208	21	0.282157	-8.6	0.8	1.86	612	11	99
A153	0.0113	12	0.00032	2	1.46721	1.88651	19	0.281019	15	0.281003	-3.9	0.5	3.24	2600	14	101
Sample DOR-1D
A05	0.0240	23	0.00075	6	1.46719	1.88649	12	0.282385	19	0.282377	-0.9	0.7	1.44	608	14	105
A06	0.0164	16	0.00053	4	1.46722	1.88639	13	0.282593	18	0.282586	7.9	0.6	1.01	670	12	99
A07	0.0168	19	0.00054	4	1.46721	1.88662	15	0.281669	24	0.281651	0.5	0.8	2.34	1800	54	99
A08	0.0152	12	0.00048	3	1.46723	1.88635	18	0.282443	16	0.282438	0.7	0.6	1.33	581	12	97
A09	0.0246	29	0.00088	9	1.46716	1.88672	12	0.282612	24	0.282601	8.3	0.8	0.98	661	13	91
A10	0.0247	23	0.00080	6	1.46716	1.88674	17	0.282515	16	0.282505	5.1	0.6	1.16	672	19	99
A11	0.0368	41	0.00120	11	1.46719	1.88654	19	0.281783	14	0.281763	-16.5	0.5	2.52	882	21	91
A12	0.0470	45	0.00136	10	1.46717	1.88663	16	0.282641	17	0.282628	6.0	0.6	0.99	516	11	100
A13	0.0186	20	0.00057	5	1.46714	1.88674	12	0.282602	18	0.282596	6.7	0.6	1.02	598	17	95
A14	0.0358	34	0.00100	8	1.46714	1.88674	8	0.282554	35	0.282542	5.6	1.2	1.11	636	16	94
A15	0.0272	24	0.00096	7	1.46717	1.88670	17	0.282455	17	0.282441	5.7	0.6	1.24	798	21	90
A16	0.0204	16	0.00062	4	1.46719	1.88666	17	0.282246	15	0.282239	-5.6	0.5	1.71	613	13	94
A17	0.0498	51	0.00155	13	1.46710	1.88704	16	0.282289	23	0.282263	1.6	0.8	1.54	896	21	96
A18	0.0206	18	0.00064	4	1.46718	1.88658	18	0.282506	15	0.282497	7.9	0.5	1.12	810	17	92
A19	0.0224	20	0.00072	6	1.46719	1.88655	15	0.281092	17	0.281066	-19.4	0.6	3.46	1838	57	100
A20	0.0693	72	0.00203	17	1.46719	1.88668	12	0.282771	20	0.282767	1.7	0.7	0.89	108	2	82
A21	0.0223	19	0.00070	4	1.46716	1.88666	17	0.281670	13	0.281658	-18.9	0.5	2.69	939	127	100
A22	0.0226	19	0.00081	5	1.46720	1.88652	17	0.282511	14	0.282499	7.0	0.5	1.14	763	15	94
A23	0.0223	21	0.00079	5	1.46727	1.88635	16	0.282500	15	0.282488	7.8	0.5	1.14	816	16	103
A24	0.0321	30	0.00091	7	1.46721	1.88651	19	0.282523	12	0.282513	2.9	0.4	1.19	560	11	93
A25	0.0174	14	0.00055	3	1.46719	1.88665	21	0.282361	17	0.282355	-2.8	0.6	1.50	555	10	92
A26	0.0340	41	0.00110	11	1.46715	1.88669	19	0.282555	13	0.282539	8.4	0.5	1.06	767	17	93
A27	0.0448	62	0.00128	14	1.46711	1.88692	14	0.281516	17	0.281471	-4.5	0.6	2.67	1858	28	88
A28	0.0228	21	0.00081	6	1.46722	1.88647	17	0.282545	16	0.282533	8.3	0.5	1.07	768	18	93
A29	0.0146	12	0.00051	3	1.46725	1.88634	20	0.282563	17	0.282556	9.0	0.6	1.02	767	15	93
A30	0.0403	36	0.00115	8	1.46717	1.88672	12	0.282715	19	0.282708	3.8	0.7	0.92	293	6	100
A35	0.0243	20	0.00078	5	1.46716	1.88664	19	0.282491	13	0.282479	6.7	0.5	1.17	784	15	90
A36	0.0303	25	0.00083	5	1.46720	1.88659	15	0.282554	17	0.282544	5.5	0.6	1.11	626	14	92
A37	0.0221	19	0.00063	5	1.46720	1.88657	18	0.282682	171	0.282675	9.2	6.1	0.87	587	13	100
A38	0.0365	29	0.00106	7	1.46720	1.88649	20	0.282641	16	0.282628	9.2	0.5	0.93	660	14	91
A39	0.0169	15	0.00051	3	1.46715	1.88686	16	0.282354	17	0.282348	-2.2	0.6	1.50	595	15	96
A40	0.0304	25	0.00087	5	1.46725	1.88642	15	0.282008	16	0.281999	-14.8	0.6	2.18	582	11	92
A41	0.0161	18	0.00048	4	1.46721	1.88652	16	0.282067	20	0.282058	-3.5	0.7	1.90	991	55	95
A42	0.0335	29	0.00125	9	1.46715	1.88670	14	0.282366	18	0.282341	8.1	0.6	1.32	1059	45	98
A44	0.0144	16	0.00043	4	1.46715	1.88684	15	0.281174	17	0.281158	-12.0	0.6	3.21	2019	28	98
A45	0.0335	27	0.00086	5	1.46723	1.88641	14	0.282623	26	0.282613	6.8	0.9	0.99	577	10	92
A46	0.0359	33	0.00094	6	1.46718	1.88669	11	0.282642	28	0.282638	-0.4	1.0	1.09	215	5	95
A47	0.0167	30	0.00051	9	1.46720	1.88651	17	0.282266	15	0.282260	-5.3	0.5	1.67	596	12	92
A48	0.0661	53	0.00189	11	1.46724	1.88641	18	0.282238	28	0.282208	-1.5	1.0	1.67	844	15	101
A49	0.0309	38	0.00104	10	1.46717	1.88663	14	0.282482	16	0.282466	6.4	0.6	1.19	790	14	94
A50	0.0411	36	0.00141	9	1.46720	1.88655	22	0.281845	14	0.281816	-10.1	0.5	2.33	1079	20	97
A51	0.0217	30	0.00066	9	1.46722	1.88649	14	0.282150	20	0.282142	-8.4	0.7	1.88	646	14	103
A52	0.0325	31	0.00101	9	1.46718	1.88672	14	0.282250	18	0.282239	-5.9	0.7	1.71	600	13	98
A53	0.0357	42	0.00100	11	1.46720	1.88643	12	0.282279	16	0.282266	-4.0	0.6	1.64	643	12	91
A54	0.0067	7	0.00013	2	1.46718	1.88677	22	0.282318	13	0.282317	-5.4	0.5	1.60	500	10	100
A55	0.0170	14	0.00055	3	1.46717	1.88679	17	0.282520	20	0.282514	5.1	0.7	1.15	658	12	97
A56	0.0305	44	0.00116	14	1.46722	1.88638	17	0.282381	15	0.282357	9.2	0.5	1.28	1085	42	95
A57	0.0348	31	0.00109	7	1.46717	1.88675	15	0.282511	18	0.282495	6.8	0.6	1.14	764	14	97
A58	0.0205	19	0.00065	5	1.46731	1.88622	15	0.281559	21	0.281536	-2.1	0.7	2.54	1864	36	93
A59	0.0185	15	0.00058	4	1.46721	1.88652	17	0.281311	33	0.281287	-3.6	1.2	2.88	2182	65	66
A60	0.0394	32	0.00109	7	1.46723	1.88651	12	0.282166	21	0.282148	-3.0	0.7	1.78	872	19	95
A61	0.0218	18	0.00068	4	1.46719	1.88668	17	0.282435	17	0.282428	0.9	0.6	1.34	607	12	105
A62	0.0094	8	0.00030	2	1.46721	1.88653	26	0.281788	13	0.281783	-13.6	0.5	2.44	979	36	95
A63	0.0193	33	0.00061	10	1.46720	1.88651	12	0.282254	18	0.282246	-4.0	0.7	1.67	675	12	96
A64	0.0179	16	0.00063	5	1.46716	1.88673	17	0.282636	15	0.282628	10.2	0.5	0.91	704	13	98
A65	0.0165	14	0.00049	3	1.46717	1.88669	19	0.280853	15	0.280824	1.5	0.5	3.35	3102	13	99
A66	0.0283	28	0.00094	7	1.46719	1.88640	20	0.282482	23	0.282471	2.5	0.8	1.26	608	13	97
A71	0.0195	16	0.00062	4	1.46719	1.88657	16	0.281296	14	0.281272	-7.2	0.5	2.97	2048	31	97
A72	0.0090	8	0.00025	2	1.46720	1.88656	17	0.282236	14	0.282233	-7.4	0.5	1.75	544	11	71
A73	0.0336	31	0.00098	7	1.46716	1.88681	17	0.282569	19	0.282556	8.0	0.7	1.04	721	14	101
A74	0.0299	26	0.00091	6	1.46715	1.88670	17	0.282624	17	0.282612	9.5	0.6	0.94	699	13	97
A75	0.0210	36	0.00071	13	1.46722	1.88650	18	0.282509	16	0.282500	5.7	0.6	1.16	706	19	83
A76	0.0304	31	0.00079	8	1.46713	1.88694	18	0.282517	14	0.282508	3.3	0.5	1.19	587	13	93
A77	0.0297	32	0.00089	9	1.46727	1.88641	17	0.282220	19	0.282208	-4.5	0.7	1.73	714	15	76
A78	0.0355	32	0.00122	9	1.46720	1.88652	16	0.282593	15	0.282575	10.2	0.5	0.98	790	19	94
A79	0.0254	21	0.00077	5	1.46725	1.88653	15	0.282202	18	0.282194	-7.6	0.7	1.80	599	13	94
A80	0.0272	24	0.00081	6	1.46719	1.88649	12	0.282574	24	0.282562	8.7	0.9	1.02	741	17	93
A81	0.0279	23	0.00092	6	1.46719	1.88671	16	0.282159	20	0.282139	4.1	0.7	1.65	1202	45	93
A82	0.0157	20	0.00044	6	1.46721	1.88650	18	0.282200	16	0.282194	-6.2	0.6	1.77	659	13	91
A83	0.0401	36	0.00131	9	1.46722	1.88648	18	0.281320	15	0.281269	-7.8	0.5	2.99	2028	20	96
A84	0.0329	34	0.00095	8	1.46712	1.88684	18	0.282190	16	0.282179	-8.1	0.6	1.83	598	12	90
A85	0.0216	21	0.00060	5	1.46713	1.88679	20	0.282397	15	0.282392	-4.0	0.5	1.48	446	9	56
A86	0.0216	20	0.00071	6	1.46724	1.88640	16	0.282517	16	0.282508	5.3	0.6	1.16	678	12	106
A87	0.0251	21	0.00081	5	1.46714	1.88682	17	0.282007	17	0.281991	-3.7	0.6	1.99	1090	45	90
A88	0.0152	12	0.00046	3	1.46717	1.88664	21	0.282207	16	0.282202	-7.1	0.6	1.78	607	12	97
A89	0.0291	32	0.00091	8	1.46722	1.88642	20	0.282549	17	0.282539	5.1	0.6	1.12	616	10	86
A90	0.0218	18	0.00061	4	1.46719	1.88670	19	0.282102	18	0.282095	-11.6	0.6	2.00	573	12	98
A91	0.0182	15	0.00055	3	1.46722	1.88653	15	0.282182	15	0.282176	-8.0	0.5	1.83	607	12	98
A92	0.0132	12	0.00035	2	1.46722	1.88661	19	0.282377	16	0.282371	5.6	0.6	1.33	902	17	103
A93	0.0149	13	0.00040	3	1.46718	1.88657	21	0.282239	14	0.282235	-6.4	0.5	1.73	586	13	129
A94	0.0592	51	0.00168	11	1.46716	1.88668	13	0.282760	24	0.282755	2.2	0.8	0.89	147	6	6
A95	0.0468	45	0.00131	9	1.46719	1.88656	23	0.280864	15	0.280851	-56.5	0.5	4.36	535	13	27
A96	0.0280	24	0.00086	5	1.46715	1.88666	17	0.282524	14	0.282512	7.6	0.5	1.11	772	15	90
A97	0.0125	12	0.00040	3	1.46720	1.88654	20	0.282466	16	0.282459	8.2	0.6	1.16	880	19	95
A98	0.0251	21	0.00075	5	1.46719	1.88661	16	0.282657	16	0.282647	10.2	0.6	0.88	675	12	98
A99	0.0225	27	0.00073	7	1.46719	1.88656	18	0.281815	15	0.281803	-15.6	0.5	2.45	855	15	98
A100	0.0788	66	0.00245	17	1.46718	1.88685	14	0.282476	24	0.282430	9.8	0.9	1.17	995	26	97
A101	0.0382	33	0.00126	8	1.46725	1.88636	16	0.281514	15	0.281490	-23.2	0.5	2.99	1013	43	95
A106	0.0383	36	0.00116	8	1.46715	1.88689	14	0.282568	17	0.282551	9.0	0.6	1.03	772	15	99
A107	0.0175	14	0.00051	3	1.46722	1.88650	17	0.282432	16	0.282426	1.1	0.6	1.34	618	13	92
A108	0.0288	24	0.00088	6	1.46718	1.88668	17	0.282446	14	0.282436	0.4	0.5	1.34	571	12	92
A109	0.0218	19	0.00064	4	1.46715	1.88660	17	0.282607	15	0.282599	6.8	0.5	1.01	598	13	97
A110	0.0282	27	0.00084	7	1.46715	1.88677	20	0.282119	15	0.282107	-7.0	0.5	1.90	760	15	93
A111	0.0262	21	0.00078	5	1.46719	1.88662	20	0.282371	17	0.282364	-3.5	0.6	1.51	513	12	92
A112	0.0523	44	0.00164	11	1.46717	1.88664	17	0.282552	16	0.282525	10.0	0.6	1.05	858	20	91
A114	0.0164	15	0.00048	4	1.46716	1.88664	18	0.282457	17	0.282451	1.9	0.6	1.29	613	11	90
A115	0.0099	9	0.00025	2	1.46719	1.88684	15	0.282212	24	0.282209	-6.4	0.8	1.76	626	13	74
Sample DOR-2A
A04	0.0117	10	0.00040	3	1.46716	1.88667	20	0.280959	17	0.280939	-6.3	0.6	3.37	2595	9	96
A05	0.0271	23	0.00089	6	1.46716	1.88684	18	0.282037	14	0.282021	-5.7	0.5	1.99	952	25	97
A06	0.0114	9	0.00037	2	1.46720	1.88652	18	0.281957	15	0.281953	-15.3	0.5	2.25	633	14	97
A07	0.0482	41	0.00159	10	1.46720	1.88652	12	0.282614	16	0.282596	6.9	0.6	1.01	607	14	93
A08	0.0112	13	0.00034	3	1.46716	1.88676	19	0.280784	16	0.280763	3.9	0.6	3.38	3294	12	102
A09	0.0194	20	0.00061	5	1.46711	1.88691	17	0.282511	16	0.282502	7.7	0.6	1.12	794	18	97
A10	0.0272	26	0.00087	7	1.46717	1.88676	11	0.282519	14	0.282505	8.5	0.5	1.10	820	18	93
A11	0.0247	26	0.00070	6	1.46717	1.88678	21	0.282229	18	0.282221	-6.0	0.6	1.74	624	18	61
A12	0.0304	28	0.00098	7	1.46723	1.88645	15	0.282443	15	0.282431	1.8	0.5	1.32	641	14	95
A13	0.0181	16	0.00058	4	1.46721	1.88655	22	0.282604	14	0.282595	11.5	0.5	0.93	813	18	101
A14	0.0204	17	0.00067	4	1.46718	1.88665	17	0.282530	15	0.282520	8.0	0.5	1.09	778	17	94
A15	0.0189	38	0.00061	11	1.46718	1.88660	9	0.282518	21	0.282509	7.5	0.7	1.11	771	17	97
A16	0.0095	9	0.00030	2	1.46719	1.88663	22	0.281688	13	0.281685	-25.3	0.5	2.77	611	14	100
A17	0.0843	105	0.00254	26	1.46722	1.88645	16	0.282380	16	0.282346	0.4	0.6	1.46	714	16	102
A18	0.0567	46	0.00181	11	1.46717	1.88657	17	0.282535	18	0.282509	7.6	0.6	1.11	777	18	101
A19	0.0233	24	0.00074	7	1.46717	1.88663	14	0.282459	16	0.282447	7.3	0.6	1.20	860	19	100
A20	0.0228	21	0.00083	7	1.46717	1.88676	16	0.282621	19	0.282609	10.3	0.7	0.93	738	17	98
A21	0.0433	38	0.00131	9	1.46709	1.88694	9	0.282337	18	0.282313	4.9	0.6	1.42	966	16	97
A22	0.0198	16	0.00059	4	1.46713	1.88680	16	0.282460	18	0.282454	1.0	0.6	1.31	570	13	94
A23	0.0162	13	0.00049	3	1.46719	1.88658	20	0.281505	14	0.281486	-1.0	0.5	2.58	1990	13	97
A24	0.0169	19	0.00051	5	1.46714	1.88684	17	0.282298	14	0.282292	-4.1	0.5	1.61	599	13	99
A25	0.0142	11	0.00045	3	1.46719	1.88661	19	0.280995	15	0.280973	-6.2	0.5	3.32	2549	9	85
A26	0.0193	20	0.00074	6	1.46710	1.88701	14	0.282542	17	0.282531	8.7	0.6	1.06	792	17	101
A27	0.0234	21	0.00071	5	1.46712	1.88690	15	0.282174	16	0.282165	-8.1	0.6	1.85	620	14	92
A28	0.0235	25	0.00075	7	1.46717	1.88665	18	0.282517	15	0.282506	8.3	0.5	1.10	812	18	82
A32	0.0132	11	0.00039	2	1.46721	1.88652	13	0.281925	15	0.281921	-16.4	0.5	2.31	638	14	90
A33	0.0353	32	0.00115	8	1.46719	1.88668	14	0.282950	16	0.282948	8.3	0.6	0.53	114	3	103
A34	0.0256	21	0.00085	5	1.46723	1.88643	18	0.282457	17	0.282446	2.7	0.6	1.29	655	14	102
A35	0.0240	26	0.00073	7	1.46721	1.88648	19	0.282469	19	0.282458	7.3	0.7	1.18	844	19	98
A39	0.0339	29	0.00128	9	1.46721	1.88655	17	0.282560	15	0.282541	9.0	0.5	1.04	789	17	97
A40	0.0370	31	0.00118	8	1.46720	1.88657	18	0.282634	16	0.282619	9.3	0.6	0.94	681	15	92
A41	0.0296	25	0.00094	6	1.46720	1.88657	13	0.281961	16	0.281943	-7.0	0.6	2.11	1019	22	104
A43	0.0291	34	0.00083	9	1.46720	1.88652	15	0.282568	16	0.282558	6.4	0.6	1.07	645	14	95
A44	0.0074	9	0.00021	2	1.46726	1.88632	15	0.282545	17	0.282542	7.3	0.6	1.07	712	17	92
A45	0.0134	11	0.00043	3	1.46720	1.88652	15	0.282182	14	0.282172	5.4	0.5	1.59	1207	40	100
A46	0.0352	33	0.00099	8	1.46713	1.88680	19	0.281420	15	0.281383	-5.2	0.5	2.79	1964	12	69
A47	0.0171	15	0.00054	4	1.46725	1.88629	16	0.282197	17	0.282191	-7.9	0.6	1.81	586	13	78
A48	0.0907	73	0.00270	16	1.46721	1.88670	10	0.282474	19	0.282424	9.5	0.7	1.18	995	23	100
A49	0.0312	26	0.00097	6	1.46720	1.88659	16	0.281954	16	0.281934	-6.0	0.6	2.11	1075	41	94
A50	0.0486	41	0.00160	10	1.46711	1.88691	17	0.282594	19	0.282567	12.5	0.7	0.94	904	48	100
A51	0.0231	20	0.00065	4	1.46720	1.88639	16	0.281069	29	0.281037	-3.2	1.0	3.19	2579	12	90
A52	0.0242	20	0.00072	5	1.46717	1.88675	20	0.282371	15	0.282357	9.2	0.5	1.28	1084	32	95
A53	0.0280	23	0.00082	5	1.46716	1.88678	18	0.282144	15	0.282132	-6.7	0.5	1.86	735	17	98
A54	0.0134	12	0.00039	3	1.46726	1.88632	17	0.282018	19	0.282014	-14.7	0.7	2.16	567	13	99
A55	0.0136	11	0.00049	3	1.46721	1.88659	17	0.282477	18	0.282470	7.4	0.6	1.17	827	18	98
A59	0.0145	12	0.00045	3	1.46723	1.88648	19	0.281871	165	0.281866	-19.4	5.8	2.43	589	13	94
A60	0.0253	23	0.00075	5	1.46718	1.88671	16	0.282368	18	0.282353	8.9	0.6	1.29	1077	24	96
A61	0.0203	17	0.00077	5	1.46720	1.88656	17	0.282534	16	0.282523	7.5	0.6	1.10	748	17	96
A62	0.0311	30	0.00099	8	1.46720	1.88652	19	0.282137	15	0.282118	-0.6	0.5	1.77	1026	31	95
A63	0.0218	29	0.00067	8	1.46720	1.88658	19	0.282524	17	0.282514	9.0	0.6	1.08	833	18	97
A64	0.0201	18	0.00058	4	1.46719	1.88665	19	0.280947	15	0.280918	-5.7	0.5	3.38	2654	13	98
A65	0.0302	57	0.00069	11	1.46721	1.88674	12	0.282107	22	0.282100	-11.1	0.8	1.98	591	13	93
A66	0.0697	62	0.00213	14	1.46717	1.88658	19	0.281857	23	0.281830	-18.8	0.8	2.47	670	16	74
A67	0.0172	18	0.00043	4	1.46720	1.88649	19	0.282167	16	0.282163	-8.9	0.6	1.86	588	14	86
A68	0.0221	26	0.00072	8	1.46718	1.88657	15	0.282400	18	0.282389	4.4	0.6	1.33	822	18	100
A69	0.0212	17	0.00064	4	1.46722	1.88646	20	0.282235	13	0.282227	-4.8	0.5	1.71	671	15	99
A70	0.0135	11	0.00041	2	1.46723	1.88644	21	0.281989	13	0.281982	-6.2	0.5	2.05	994	15	100
A71	0.0300	27	0.00098	7	1.46718	1.88672	14	0.282470	17	0.282460	1.5	0.6	1.29	583	13	95
A72	0.0115	15	0.00035	4	1.46723	1.88644	22	0.281308	21	0.281295	-7.9	0.8	2.95	1985	17	95
A73	0.0201	17	0.00074	5	1.46717	1.88670	17	0.282534	16	0.282523	7.3	0.6	1.10	741	16	93
A74	0.0149	12	0.00047	3	1.46720	1.88661	19	0.282633	14	0.282627	10.3	0.5	0.91	709	16	98
A76	0.0184	15	0.00059	4	1.46720	1.88655	18	0.282324	14	0.282316	1.0	0.5	1.49	787	17	102
A77	0.0348	46	0.00093	10	1.46719	1.88659	22	0.282559	13	0.282547	6.8	0.5	1.08	683	15	92
A78	0.0249	23	0.00091	7	1.46718	1.88660	18	0.282200	17	0.282181	3.6	0.6	1.61	1111	34	95
A79	0.0240	23	0.00078	5	1.46715	1.88683	18	0.282498	18	0.282486	7.9	0.7	1.14	829	18	99
A80	0.0207	19	0.00062	5	1.46715	1.88681	10	0.281147	23	0.281124	-13.9	0.8	3.28	1989	16	100
A81	0.0290	45	0.00101	16	1.46721	1.88659	10	0.282501	24	0.282486	6.8	0.9	1.16	777	17	97
A82	0.0089	8	0.00025	2	1.46718	1.88664	17	0.281959	18	0.281955	-10.8	0.6	2.17	828	19	91
A83	0.0192	16	0.00061	4	1.46714	1.88666	20	0.282458	13	0.282449	7.0	0.5	1.20	844	19	95
A84	0.0421	36	0.00113	7	1.46721	1.88643	10	0.282214	19	0.282195	-0.4	0.7	1.67	917	23	98
A88	0.0341	34	0.00103	9	1.46719	1.88661	14	0.282670	123	0.282659	8.2	4.3	0.91	569	13	99
A89	0.0233	21	0.00074	6	1.46728	1.88639	13	0.282562	20	0.282553	6.0	0.7	1.09	635	14	95
A90	0.0228	19	0.00077	5	1.46719	1.88648	15	0.282510	14	0.282498	8.1	0.5	1.12	813	18	100
A91	0.0265	24	0.00078	6	1.46718	1.88661	18	0.282568	17	0.282557	8.9	0.6	1.02	761	17	95
A92	0.0186	16	0.00056	4	1.46718	1.88663	20	0.282331	16	0.282323	-0.6	0.6	1.51	703	15	100
A93	0.0171	19	0.00049	5	1.46727	1.88643	15	0.282527	16	0.282521	6.7	0.6	1.11	716	16	97
A94	0.0441	38	0.00144	9	1.46717	1.88664	16	0.282597	17	0.282577	9.6	0.6	0.99	758	20	101
A95	0.0136	13	0.00040	3	1.46716	1.88670	18	0.282495	15	0.282489	7.6	0.5	1.14	805	17	99
A96	0.0413	34	0.00134	8	1.46717	1.88669	17	0.282512	15	0.282491	7.9	0.5	1.13	816	18	93
A97	0.0196	19	0.00059	4	1.46717	1.88664	10	0.281704	17	0.281692	-15.6	0.6	2.59	1031	25	96
A98	0.0283	26	0.00080	6	1.46712	1.88679	24	0.282320	15	0.282311	-3.7	0.5	1.58	587	13	99
A99	0.0125	10	0.00037	2	1.46713	1.88684	15	0.282225	16	0.282221	-7.6	0.6	1.76	556	13	85
A100	0.0209	19	0.00071	5	1.46709	1.88690	13	0.282550	16	0.282540	7.3	0.6	1.08	712	16	100
A101	0.0276	24	0.00088	6	1.46715	1.88669	16	0.282172	17	0.282162	-8.8	0.6	1.86	596	13	98
A102	0.0146	12	0.00048	3	1.46715	1.88676	21	0.282187	16	0.282178	0.2	0.6	1.68	968	21	100
A103	0.0253	23	0.00087	7	1.46717	1.88661	21	0.281541	25	0.281508	0.5	0.9	2.52	2020	13	90
A104	0.0125	10	0.00041	3	1.46715	1.88678	18	0.282278	16	0.282270	5.8	0.6	1.45	1070	21	99
A105	0.0315	33	0.00097	8	1.46717	1.88663	18	0.281636	16	0.281600	2.1	0.6	2.38	1948	181	51
A106	0.0544	45	0.00151	10	1.46715	1.88686	19	0.281894	16	0.281866	-10.7	0.6	2.28	975	15	98
A107	0.0141	12	0.00042	3	1.46722	1.88649	16	0.282294	16	0.282289	-2.4	0.6	1.58	678	15	98
A109	0.0167	26	0.00041	4	1.46718	1.88677	17	0.282483	199	0.282478	5.0	7.0	1.20	710	16	93
A110	0.0166	14	0.00054	3	1.46720	1.88658	20	0.282636	15	0.282629	9.6	0.5	0.92	674	16	98
A111	0.0246	20	0.00088	6	1.46719	1.88666	19	0.282450	15	0.282438	3.6	0.5	1.28	710	16	98
A112	0.0136	11	0.00044	3	1.46714	1.88679	18	0.281346	14	0.281329	-5.0	0.5	2.86	2056	15	101
A117	0.0115	9	0.00035	2	1.46721	1.88649	20	0.282344	14	0.282341	-4.2	0.5	1.55	514	11	98
A119	0.0108	9	0.00030	2	1.46716	1.88672	23	0.281407	19	0.281396	-7.7	0.7	2.82	1836	10	97
Sample 15-10
A154	0.0227	42	0.00058	13	1.46716	1.88671	5	0.282038	216	0.282028	-7.2	7.7	2.01	877	12	92
A155	0.0193	16	0.00064	4	1.46721	1.88655	19	0.282325	19	0.282316	0.1	0.7	1.50	748	14	98
A156	0.0326	36	0.00117	10	1.46717	1.88668	14	0.281724	32	0.281716	-29.9	1.1	2.81	355	47	51
A157	0.0197	16	0.00067	4	1.46716	1.88673	13	0.282517	14	0.282509	5.1	0.5	1.16	663	10	103
A158	0.0222	43	0.00073	11	1.46719	1.88659	7	0.282562	26	0.282553	5.6	0.9	1.09	618	9	86
A159	0.0145	12	0.00048	3	1.46715	1.88682	9	0.281816	19	0.281811	-21.3	0.7	2.54	592	10	98
A160	0.0247	31	0.00079	9	1.46711	1.88688	18	0.282241	25	0.282230	-4.3	0.9	1.69	688	14	94
A161	0.0379	35	0.00135	10	1.46718	1.88664	14	0.282498	20	0.282479	5.6	0.7	1.19	733	15	98
A162	0.0111	21	0.00041	8	1.46720	1.88656	11	0.282380	20	0.282372	8.1	0.7	1.28	1013	37	98
A163	0.0212	22	0.00069	6	1.46717	1.88672	16	0.282138	16	0.282130	-9.6	0.6	1.92	611	11	102
A164	0.0239	24	0.00074	7	1.46720	1.88654	18	0.282100	20	0.282092	-11.1	0.7	2.00	602	7	100
A165	0.0132	13	0.00043	3	1.46713	1.88687	13	0.281618	102	0.281611	-23.0	3.6	2.83	830	16	58
A166	0.0265	24	0.00083	6	1.46718	1.88666	16	0.282176	27	0.282166	-7.3	0.9	1.83	656	15	99
A167	0.0414	47	0.00096	12	1.46717	1.88670	11	0.281819	269	0.281806	-19.2	9.5	2.51	692	19	98
A168	0.0496	43	0.00150	10	1.46723	1.88642	7	0.282599	27	0.282588	1.4	0.9	1.12	375	6	103
A170	0.0070	7	0.00029	3	1.46721	1.88650	10	0.282286	21	0.282282	-2.7	0.8	1.60	674	13	95
A171	0.0111	10	0.00036	2	1.46718	1.88667	19	0.281303	17	0.281290	-7.7	0.6	2.96	1999	19	99
A172	0.0114	10	0.00040	3	1.46717	1.88666	13	0.282493	25	0.282487	6.1	0.9	1.17	744	10	101
A173	0.0181	21	0.00059	5	1.46725	1.88628	18	0.282211	16	0.282204	-5.9	0.6	1.76	657	14	100
A174	0.0264	26	0.00104	8	1.46719	1.88658	20	0.282486	15	0.282469	8.7	0.5	1.14	886	20	95
A175	0.0225	26	0.00070	7	1.46719	1.88659	21	0.281032	17	0.281000	-8.2	0.6	3.33	2420	20	104
A176	0.0164	15	0.00051	4	1.46722	1.88637	22	0.282148	22	0.282142	-8.0	0.8	1.87	663	9	102
A177	0.0313	58	0.00109	19	1.46718	1.88663	15	0.281799	26	0.281776	-10.4	0.9	2.39	1127	44	95
A178	0.0258	21	0.00079	5	1.46720	1.88648	18	0.282513	25	0.282505	2.3	0.9	1.22	548	9	91
A179	0.0315	28	0.00100	7	1.46712	1.88696	16	0.282293	19	0.282281	-3.5	0.7	1.61	642	12	98
A180	0.0242	20	0.00075	5	1.46714	1.88683	22	0.282223	19	0.282214	-5.5	0.7	1.74	657	14	97
A181	0.0312	35	0.00076	8	1.46717	1.88667	11	0.282230	84	0.282222	-7.0	3.0	1.75	577	10	98
A183	0.0239	20	0.00085	6	1.46724	1.88649	12	0.282533	25	0.282523	4.2	0.9	1.16	603	8	100
A184	0.0203	23	0.00069	7	1.46715	1.88669	30	0.281983	22	0.281976	-15.1	0.8	2.22	607	6	94
A185	0.0354	31	0.00119	9	1.46716	1.88675	17	0.282597	16	0.282580	9.0	0.6	0.99	726	11	97
A186	0.0246	20	0.00077	5	1.46716	1.88662	19	0.282195	22	0.282186	-7.4	0.8	1.81	617	11	102
A187	0.0138	24	0.00036	5	1.46719	1.88667	21	0.281332	16	0.281318	-7.1	0.6	2.91	1981	33	99
A189	0.0186	15	0.00057	4	1.46716	1.88679	15	0.282125	28	0.282118	-9.1	1.0	1.93	651	8	98
A191	0.0140	17	0.00044	4	1.46714	1.88670	15	0.282611	20	0.282606	7.2	0.7	0.99	606	8	96
A192	0.0382	34	0.00123	9	1.46722	1.88645	27	0.282571	70	0.282553	9.8	2.5	1.01	806	13	98
A200	0.1591	400	0.00408	100	1.46720	1.88654	12	0.282233	32	0.282183	-6.7	1.1	1.80	652	11	96
A201	0.0199	19	0.00065	5	1.46717	1.88665	18	0.282185	17	0.282172	1.0	0.6	1.67	1013	66	99
A202	0.0206	38	0.00060	4	1.46718	1.88664	16	0.282478	19	0.282469	7.5	0.7	1.17	834	13	96
A203	0.0522	45	0.00156	11	1.46717	1.88667	11	0.282277	32	0.282260	-5.8	1.1	1.68	572	10	108
A204	0.0310	30	0.00100	8	1.46713	1.88683	15	0.281876	34	0.281857	-10.5	1.2	2.29	997	16	101
A205	0.0803	67	0.00275	18	1.46716	1.88664	16	0.282465	34	0.282427	4.1	1.2	1.28	750	11	92
A206	0.0148	15	0.00061	6	1.46723	1.88641	14	0.282555	20	0.282546	9.4	0.7	1.03	798	14	93
A207	0.0284	42	0.00093	12	1.46708	1.88689	18	0.282661	36	0.282651	8.3	1.3	0.92	584	9	94
A208	0.0301	33	0.00105	9	1.46726	1.88641	15	0.282086	17	0.282065	-1.7	0.6	1.86	1062	50	99
A209	0.0384	43	0.00124	11	1.46721	1.88649	19	0.282012	31	0.281989	-5.8	1.1	2.03	998	32	98
A210	0.0087	9	0.00029	2	1.46716	1.88683	10	0.282197	25	0.282191	2.0	0.9	1.63	1025	19	107
A211	0.0239	20	0.00094	6	1.46722	1.88648	17	0.282460	22	0.282446	6.4	0.8	1.22	823	12	98
A212	0.0279	23	0.00082	6	1.46725	1.88638	17	0.282535	41	0.282526	4.1	1.5	1.15	596	11	42
A213	0.0069	12	0.00018	3	1.46721	1.88650	21	0.282060	17	0.282058	-10.7	0.6	2.03	673	10	92
A215	0.0243	27	0.00077	7	1.46721	1.88653	16	0.281987	24	0.281970	-2.7	0.9	2.00	1167	48	103
A216	0.0528	43	0.00191	12	1.46721	1.88650	8	0.282498	30	0.282468	7.9	1.1	1.16	856	15	97
A217	0.0209	18	0.00070	4	1.46723	1.88648	18	0.282398	25	0.282386	5.4	0.9	1.31	870	21	95
A218	0.0264	40	0.00111	15	1.46720	1.88647	13	0.281608	25	0.281589	-21.7	0.9	2.83	922	49	100
A220	0.0342	29	0.00119	8	1.46720	1.88654	16	0.281158	23	0.281105	-6.2	0.8	3.16	2347	15	92
A221	0.0458	42	0.00166	11	1.46711	1.88694	9	0.282518	68	0.282480	15.9	2.4	0.99	1188	74	92
A222	0.0139	12	0.00047	3	1.46718	1.88665	18	0.282496	14	0.282489	8.5	0.5	1.12	849	11	91
A223	0.0359	30	0.00108	7	1.46721	1.88645	17	0.282458	20	0.282444	3.6	0.7	1.27	701	10	102
A224	0.0179	15	0.00064	4	1.46718	1.88673	23	0.282628	13	0.282619	10.7	0.5	0.91	742	11	100
A225	0.0229	19	0.00074	5	1.46724	1.88642	17	0.281767	20	0.281755	-18.2	0.7	2.56	817	6	96
A226	0.0261	22	0.00086	5	1.46717	1.88672	14	0.282507	18	0.282498	3.6	0.7	1.20	616	10	104
A227	0.0858	147	0.00239	35	1.46718	1.88654	17	0.282159	18	0.282118	-2.9	0.7	1.81	926	26	97
A228	0.0282	28	0.00084	6	1.46726	1.88614	19	0.282627	24	0.282617	9.3	0.8	0.94	684	11	96
A229	0.0350	28	0.00113	7	1.46720	1.88654	24	0.282460	16	0.282447	1.3	0.5	1.31	595	11	85
A230	0.0350	28	0.00114	7	1.46721	1.88654	23	0.282456	14	0.282440	4.4	0.5	1.26	745	21	97
A231	0.0716	60	0.00241	16	1.46720	1.88654	17	0.282338	16	0.282301	1.1	0.6	1.50	815	11	94
A232	0.0271	24	0.00083	6	1.46722	1.88633	20	0.281568	20	0.281541	-5.5	0.7	2.60	1707	23	90
A233	0.0428	35	0.00135	9	1.46714	1.88675	20	0.282488	16	0.282466	7.6	0.6	1.17	843	10	99
A234	0.0132	18	0.00030	3	1.46722	1.88650	10	0.281092	44	0.281077	-1.3	1.6	3.10	2601	16	98
A235	0.0168	14	0.00053	3	1.46720	1.88659	19	0.282461	17	0.282452	8.7	0.6	1.16	914	38	99
A236	0.0364	39	0.00060	5	1.46715	1.88708	2	0.282312	115	0.282302	2.9	4.1	1.47	895	28	98
A243	0.0259	22	0.00081	5	1.46711	1.88707	20	0.281363	18	0.281328	-1.0	0.6	2.78	2230	23	96
A244	0.0191	35	0.00047	4	1.46714	1.88675	15	0.282493	23	0.282487	4.6	0.8	1.20	678	11	88
A245	0.0171	14	0.00055	3	1.46718	1.88648	24	0.282453	17	0.282446	2.1	0.6	1.30	631	11	103
A246	0.0346	32	0.00114	9	1.46722	1.88650	27	0.281638	18	0.281594	3.2	0.6	2.36	2003	21	71
A247	0.0255	24	0.00076	7	1.46723	1.88646	21	0.281080	18	0.281042	-2.2	0.7	3.16	2614	15	88
A248	0.0345	30	0.00111	8	1.46720	1.88662	20	0.282510	14	0.282492	9.1	0.5	1.11	868	17	96
A249	0.0109	12	0.00034	2	1.46721	1.88646	25	0.281982	28	0.281971	8.0	1.0	1.79	1633	47	90
A250	0.0311	28	0.00101	7	1.46720	1.88646	11	0.281983	20	0.281972	-16.5	0.7	2.25	550	9	94
A251	0.0129	13	0.00038	3	1.46721	1.88657	23	0.281223	16	0.281208	-8.0	0.6	3.07	2115	17	101
A252	0.0265	33	0.00062	5	1.46717	1.88706	9	0.281965	60	0.281954	-8.1	2.1	2.12	951	35	98
A253	0.0400	40	0.00120	10	1.46710	1.88695	14	0.282964	17	0.282963	7.3	0.6	0.53	45	2	8
A254	0.0116	11	0.00037	3	1.46720	1.88649	22	0.281003	14	0.280988	-15.3	0.5	3.48	2136	28	63
A255	0.0178	15	0.00063	4	1.46727	1.88645	10	0.282051	21	0.282040	-5.2	0.8	1.96	946	47	97
A256	0.0396	48	0.00126	13	1.46713	1.88678	12	0.281853	23	0.281828	-10.5	0.8	2.32	1045	33	90
A257	0.0273	22	0.00077	5	1.46721	1.88644	11	0.282294	22	0.282279	5.7	0.8	1.44	1051	17	103
A258	0.0241	24	0.00079	7	1.46711	1.88705	15	0.282203	37	0.282195	-8.2	1.3	1.81	568	14	89
A259	0.0300	25	0.00096	6	1.46719	1.88628	20	0.281986	22	0.281975	-14.3	0.8	2.20	642	12	101
A262	0.0291	25	0.00094	6	1.46715	1.88644	20	0.282004	19	0.281991	-11.4	0.7	2.13	747	35	28
A265	0.0231	20	0.00076	5	1.46725	1.88634	25	0.282038	14	0.282024	-5.6	0.5	1.98	951	25	96
A268	0.0332	27	0.00101	6	1.46713	1.88666	22	0.282258	14	0.282237	5.6	0.5	1.50	1113	17	103
A269	0.0313	35	0.00094	10	1.46723	1.88651	18	0.282284	26	0.282264	6.2	0.9	1.45	1098	27	100
A270	0.0528	82	0.00123	20	1.46711	1.88692	23	0.282127	17	0.282110	-7.3	0.6	1.90	741	15	93
A271	0.0505	42	0.00154	10	1.46722	1.88649	25	0.281819	14	0.281780	-5.6	0.5	2.30	1332	36	100
Sample DOR-2C
A05	0.0207	21	0.00068	8	1.46719	1.88655	10	0.282020	17	0.282004	0.4	0.6	1.90	1250	60	96
A06	0.0304	29	0.00099	8	1.46718	1.88662	16	0.281315	13	0.281278	-9.6	0.5	3.01	1937	54	97
A07	0.0288	27	0.00097	8	1.46712	1.88688	19	0.282562	16	0.282551	4.8	0.6	1.11	584	9	94
A08	0.0239	21	0.00075	5	1.46714	1.88688	19	0.282374	18	0.282364	0.4	0.6	1.43	687	11	93
A09	0.0330	27	0.00098	6	1.46715	1.88668	19	0.282370	13	0.282352	6.4	0.5	1.34	967	29	99
A10	0.0263	21	0.00091	5	1.46714	1.88684	5	0.282565	27	0.282555	4.8	1.0	1.11	581	10	98
A11	0.0181	16	0.00064	5	1.46713	1.88687	15	0.282231	21	0.282224	-6.5	0.7	1.74	597	10	98
A12	0.0536	46	0.00211	14	1.46712	1.88677	14	0.282564	21	0.282536	6.9	0.7	1.09	701	15	90
A13	0.0089	9	0.00028	2	1.46718	1.88655	18	0.282513	13	0.282509	8.7	0.5	1.09	826	14	100
A14	0.0553	46	0.00233	15	1.46716	1.88663	12	0.282687	16	0.282656	11.2	0.6	0.85	707	12	99
A15	0.0592	59	0.00175	13	1.46712	1.88688	17	0.282502	16	0.282471	9.8	0.6	1.12	931	24	98
A16	0.0112	9	0.00035	2	1.46718	1.88659	14	0.282468	16	0.282463	7.1	0.6	1.18	826	12	95
A17	0.0345	34	0.00104	9	1.46709	1.88705	12	0.282191	17	0.282178	-7.0	0.6	1.81	650	14	104
A18	0.0142	12	0.00045	3	1.46715	1.88676	12	0.282022	19	0.282017	-13.7	0.7	2.14	607	9	96
A19	0.0424	56	0.00128	15	1.46713	1.88665	17	0.282098	18	0.282076	-4.3	0.6	1.89	928	19	100
A20	0.0270	32	0.00093	10	1.46708	1.88700	16	0.282617	19	0.282606	8.0	0.7	0.98	642	12	105
A21	0.0385	34	0.00114	9	1.46711	1.88688	16	0.282558	15	0.282545	5.8	0.5	1.10	640	9	97
A22	0.0052	7	0.00012	2	1.46712	1.88692	21	0.282402	17	0.282400	5.5	0.6	1.29	854	13	99
A23	0.0458	39	0.00122	9	1.46714	1.88675	14	0.282324	16	0.282304	1.8	0.6	1.49	841	9	91
A24	0.0174	15	0.00056	4	1.46710	1.88693	16	0.282303	17	0.282295	-1.2	0.6	1.55	722	13	91
A25	0.0278	25	0.00090	7	1.46712	1.88683	15	0.282468	17	0.282457	3.0	0.6	1.27	652	9	100
A26	0.0486	41	0.00171	11	1.46708	1.88696	14	0.282511	16	0.282485	7.4	0.6	1.15	807	10	99
A27	0.0496	69	0.00157	20	1.46708	1.88691	14	0.282473	21	0.282443	10.6	0.8	1.14	1014	40	91
A28	0.0138	14	0.00043	4	1.46713	1.88681	17	0.281461	18	0.281453	-24.2	0.6	3.05	1025	56	97
A29	0.0196	17	0.00060	4	1.46720	1.88653	9	0.281906	19	0.281895	-10.1	0.7	2.23	957	62	99
A30	0.0275	23	0.00096	6	1.46707	1.88702	17	0.282615	15	0.282602	8.8	0.5	0.97	682	9	97
A35	0.0117	19	0.00040	7	1.46710	1.88693	17	0.281121	15	0.281101	-0.4	0.5	3.05	2604	18	97
A36	0.0698	61	0.00205	14	1.46713	1.88667	11	0.282204	18	0.282174	-4.5	0.6	1.77	763	13	100
A37	0.0341	32	0.00139	10	1.46714	1.88671	15	0.282505	15	0.282482	8.7	0.5	1.13	866	14	101
A38	0.0366	51	0.00124	16	1.46705	1.88705	16	0.282590	15	0.282570	11.9	0.5	0.95	872	17	69
A39	0.0191	18	0.00063	5	1.46708	1.88695	16	0.282524	15	0.282515	8.6	0.5	1.08	814	14	93
A41	0.0267	26	0.00095	7	1.46709	1.88689	13	0.282640	18	0.282629	9.1	0.6	0.93	656	11	91
A42	0.0323	34	0.00105	8	1.46709	1.88705	11	0.282584	22	0.282572	5.7	0.8	1.07	594	11	95
A43	0.0456	44	0.00166	12	1.46713	1.88672	16	0.282629	18	0.282605	10.6	0.6	0.93	757	12	99
A44	0.0396	36	0.00133	10	1.46711	1.88680	14	0.282591	16	0.282575	6.4	0.6	1.05	619	11	102
A45	0.0589	53	0.00190	14	1.46705	1.88703	13	0.282706	21	0.282683	10.6	0.7	0.83	638	10	99
A46	0.0262	43	0.00073	10	1.46709	1.88668	10	0.282232	26	0.282224	-6.7	0.9	1.74	589	55	17
A47	0.0295	32	0.00100	10	1.46708	1.88690	15	0.282345	18	0.282324	8.6	0.6	1.33	1110	79	100
A48	0.0201	18	0.00063	5	1.46707	1.88703	15	0.282532	17	0.282526	2.0	0.6	1.19	501	9	98
A49	0.0245	23	0.00079	6	1.46710	1.88686	12	0.282583	18	0.282574	6.2	0.7	1.06	610	9	98
A50	0.0201	50	0.00074	17	1.46710	1.88688	14	0.282537	18	0.282527	6.2	0.6	1.11	686	10	93
A51	0.0269	22	0.00086	6	1.46711	1.88681	15	0.282258	17	0.282247	-3.8	0.6	1.66	680	13	99
A52	0.0161	13	0.00047	3	1.46705	1.88705	16	0.282317	17	0.282311	-2.9	0.6	1.56	619	8	87
A53	0.0480	39	0.00154	9	1.46717	1.88665	11	0.282580	23	0.282563	5.6	0.8	1.08	603	11	101
A54	0.0294	24	0.00096	6	1.46708	1.88697	14	0.282187	17	0.282174	-4.5	0.6	1.77	765	13	102
A55	0.0532	51	0.00180	14	1.46706	1.88699	15	0.282528	20	0.282499	8.9	0.7	1.10	848	12	92
A56	0.0418	40	0.00119	9	1.46709	1.88683	15	0.283025	14	0.283024	9.1	0.5	0.41	29	1	17
A57	0.0209	18	0.00074	5	1.46708	1.88696	17	0.280906	15	0.280863	0.5	0.5	3.32	2999	11	101
A58	0.0248	20	0.00080	5	1.46708	1.88695	17	0.282140	17	0.282131	-8.7	0.6	1.90	649	12	97
A59	0.0156	13	0.00051	3	1.46706	1.88705	18	0.282273	16	0.282267	-5.7	0.6	1.67	566	10	90
A60	0.0034	9	0.00008	2	1.46706	1.88705	29	0.282310	12	0.282309	-3.4	0.4	1.58	603	9	97
A61	0.0298	25	0.00098	6	1.46707	1.88702	12	0.282548	22	0.282537	4.6	0.8	1.13	598	11	96
A62	0.0212	17	0.00058	4	1.46707	1.88697	14	0.282179	16	0.282173	-8.2	0.6	1.84	602	10	100
A63	0.0183	15	0.00062	4	1.46706	1.88701	15	0.281726	14	0.281714	-15.4	0.5	2.56	1003	65	99
A64	0.0166	14	0.00058	4	1.46704	1.88713	18	0.281003	15	0.280975	-8.1	0.5	3.36	2463	17	68
A65	0.0207	17	0.00073	4	1.46706	1.88701	18	0.282570	14	0.282559	8.7	0.5	1.03	746	10	98
A66	0.0295	53	0.00120	21	1.46704	1.88706	22	0.282629	16	0.282613	10.3	0.6	0.93	734	10	94
A72	0.0213	18	0.00068	4	1.46710	1.88690	17	0.282628	17	0.282619	9.6	0.6	0.93	690	11	91
A73	0.0359	29	0.00110	7	1.46706	1.88702	11	0.282717	20	0.282714	1.5	0.7	0.96	180	3	102
A74	0.0172	14	0.00053	3	1.46705	1.88709	19	0.281892	15	0.281885	-14.9	0.5	2.33	758	9	96
A75	0.0079	10	0.00024	2	1.46706	1.88695	16	0.282290	13	0.282287	-5.3	0.5	1.64	553	10	91
A76	0.0092	8	0.00024	2	1.46707	1.88705	17	0.282240	16	0.282237	-4.1	0.6	1.68	686	50	76
A77	0.0247	31	0.00090	10	1.46709	1.88688	16	0.282576	15	0.282563	9.1	0.5	1.01	757	11	94
A78	0.0058	10	0.00017	3	1.46707	1.88700	16	0.280687	20	0.280678	-11.5	0.7	3.79	2772	28	98
A79	0.0228	20	0.00077	5	1.46710	1.88688	20	0.281279	14	0.281251	-10.4	0.5	3.06	1943	28	104
A80	0.0288	33	0.00112	12	1.46711	1.88684	13	0.282554	22	0.282541	5.6	0.8	1.11	636	12	102
A81	0.0054	4	0.00018	1	1.46706	1.88710	9	0.280618	19	0.280610	-18.0	0.7	4.01	2599	48	94
A82	0.0250	29	0.00084	8	1.46707	1.88695	16	0.282211	14	0.282200	-5.0	0.5	1.74	703	10	96
A83	0.0149	12	0.00054	3	1.46708	1.88701	17	0.282430	15	0.282422	5.8	0.5	1.26	836	15	97
A84	0.0322	27	0.00124	8	1.46707	1.88700	9	0.282520	22	0.282500	9.6	0.8	1.09	880	17	94
A85	0.0140	14	0.00050	4	1.46714	1.88679	11	0.282281	19	0.282275	-4.0	0.7	1.63	631	12	103
A86	0.0287	24	0.00096	7	1.46707	1.88698	16	0.282237	15	0.282225	-4.9	0.5	1.71	670	12	99
A87	0.0300	25	0.00092	7	1.46706	1.88701	16	0.281165	19	0.281129	-12.2	0.7	3.25	2052	50	99
A88	0.0321	39	0.00105	12	1.46710	1.88690	11	0.282231	17	0.282220	-7.4	0.6	1.76	563	9	85
A89	0.0205	19	0.00073	6	1.46717	1.88666	11	0.280901	14	0.280862	-4.3	0.5	3.42	2799	12	98
A90	0.0253	21	0.00085	5	1.46713	1.88670	14	0.281867	20	0.281851	-11.3	0.7	2.31	974	134	94
A091	0.0129	15	0.00040	3	1.46707	1.88696	19	0.282500	17	0.282495	5.2	0.6	1.17	694	11	105
A92	0.0182	17	0.00059	4	1.46709	1.88687	18	0.281298	17	0.281276	-8.5	0.6	2.99	1988	38	101
A93	0.0269	25	0.00088	7	1.46709	1.88689	16	0.282276	20	0.282264	-2.3	0.7	1.61	722	14	101
A94	0.0144	12	0.00043	3	1.46706	1.88702	15	0.282030	18	0.282025	-13.0	0.6	2.12	621	9	109
A95	0.0095	9	0.00023	2	1.46713	1.88680	16	0.282278	24	0.282275	-4.6	0.9	1.64	602	9	101
A96	0.0170	19	0.00055	5	1.46708	1.88697	17	0.281666	16	0.281658	-21.3	0.6	2.74	831	12	100
A97	0.0441	82	0.00126	20	1.46706	1.88707	13	0.282421	16	0.282403	3.5	0.6	1.33	762	11	99
A98	0.0115	11	0.00037	3	1.46717	1.88665	20	0.281000	17	0.280981	-3.4	0.6	3.26	2656	16	98
A99	0.0249	20	0.00083	5	1.46707	1.88706	14	0.282451	13	0.282439	5.4	0.5	1.24	789	11	99
A100	0.0116	9	0.00040	2	1.46710	1.88691	22	0.280767	21	0.280747	-13.5	0.7	3.75	2582	16	96
A101	0.0552	65	0.00169	17	1.46709	1.88690	17	0.281675	14	0.281645	-19.5	0.5	2.72	933	17	102
A107	0.0297	28	0.00093	7	1.46713	1.88675	19	0.282178	15	0.282166	-6.3	0.5	1.81	698	12	97
A108	0.0121	10	0.00037	2	1.46709	1.88691	20	0.281319	16	0.281305	-6.9	0.6	2.92	2010	13	99
A109	0.0109	10	0.00040	3	1.46712	1.88668	11	0.282194	20	0.282190	-8.5	0.7	1.82	563	9	98
A110	0.0353	43	0.00126	13	1.46713	1.88669	13	0.282286	18	0.282271	-3.6	0.6	1.63	652	8	98
A111	0.0415	35	0.00143	9	1.46708	1.88696	8	0.282157	25	0.282143	-11.2	0.9	1.93	516	8	82
A112	0.0363	35	0.00131	11	1.46709	1.88696	16	0.282389	15	0.282367	5.5	0.5	1.33	908	14	105
A113	0.1129	100	0.00376	26	1.46709	1.88685	12	0.282595	22	0.282525	13.1	0.8	0.99	995	15	100
A114	0.0529	45	0.00142	9	1.46709	1.88690	14	0.282508	16	0.282502	-5.1	0.6	1.35	221	4	91
A115	0.0142	12	0.00048	3	1.46708	1.88686	21	0.281607	25	0.281590	0.7	0.9	2.42	1901	15	99
A116	0.0342	28	0.00116	7	1.46706	1.88700	19	0.282575	15	0.282558	8.9	0.5	1.02	758	15	102
A117	0.0350	31	0.00113	8	1.46707	1.88700	16	0.282449	14	0.282437	1.0	0.5	1.33	595	8	90
A118	0.0509	42	0.00188	12	1.46705	1.88697	11	0.281545	24	0.281477	-3.1	0.9	2.63	1913	18	99
A119	0.0930	167	0.00239	37	1.46705	1.88704	16	0.281064	18	0.280982	-23.1	0.7	3.63	1807	52	55
A120	0.0270	24	0.00097	6	1.46709	1.88685	17	0.282161	17	0.282150	-8.2	0.6	1.87	640	7	97
A121	0.0132	11	0.00042	3	1.46713	1.88680	15	0.281940	15	0.281932	-6.8	0.5	2.12	1044	34	99
A122	0.0608	61	0.00201	17	1.46713	1.88669	14	0.280474	18	0.280330	-1.9	0.6	4.02	3697	13	94
A123	0.0381	37	0.00124	11	1.46719	1.88658	12	0.281656	15	0.281632	-17.4	0.5	2.70	1046	46	98
A124	0.0149	12	0.00061	4	1.46714	1.88676	16	0.282563	14	0.282554	9.6	0.5	1.02	795	13	98
A125	0.0173	15	0.00059	4	1.46717	1.88671	10	0.282433	18	0.282426	1.1	0.6	1.34	619	10	100
A126	0.0096	8	0.00033	2	1.46716	1.88675	15	0.280330	19	0.280314	-31.0	0.7	4.62	2491	37	92
A127	0.0146	13	0.00047	3	1.46711	1.88698	18	0.281137	13	0.281119	-13.6	0.5	3.28	2008	17	93
A128	0.0833	71	0.00297	20	1.46718	1.88661	17	0.282544	16	0.282505	5.8	0.6	1.15	700	8	90
A129	0.0440	36	0.00135	8	1.46718	1.88660	14	0.282325	18	0.282310	-4.1	0.6	1.59	571	11	108
Plesovice (n=40)	0.0047	29	0.00011	7	1.46720	1.88665	19	0.282475	18	0.282475	-3.5	0.6	1.36	338	3
GJ-1 (n=42)	0.0079	3	0.00027	1	1.46721	1.88665	14	0.282008	20	0.282005	-14.1	0.7	2.16	606	6
JMC 475 (n=8)					1.46718	1.88670	15	0.282146	8
Quoted uncertainties (absolute) relate to the last quoted figure. The effect of the inter-element fractionation on the Lu/Hf was estimated to be about 6 % or less based on analyses of the GJ-1 and Plesovi?e zircon. Accuracy and reproducibilty was checked by repeated analyses (n = 42 and 40, respectively) of reference zircon GJ-1 and Plesovi?e (data given as mean with 2 standard deviation uncertai…
(a) 176Yb/177Hf = (176Yb/173Yb)true x (173Yb/177Hf)meas x (M173(Yb)/M177(Hf))b(Hf), b(Hf) = ln(179Hf/177Hf true / 179Hf/177Hfmeasured )/ ln (M179(Hf)/M177(Hf) ), M=mass of respective isotope. The 176Lu/177Hf were calculated in a similar way by using the 175Lu/177Hf and b(Yb).
(b) Mean Hf signal in volt.
(c) Uncertainties are quadratic additions of the within-run precision and the daily reproducibility of the 40ppb-JMC475 solution. Uncertainties for the JMC475 quoted at 2SD (2 standard deviation).
(d) Initial 176Hf/177Hf and eHf calculated using the apparent Pb-Pb age determined by LA-ICP-MS dating (see column f), and the CHUR parameters:
176Lu/177Hf = 0.0336, and 176Hf/177Hf = 0.282785 (Bouvier et al., 2008).
(e) Two stage model age in billion years using the measured 176Lu/177Hf of each spot (first stage = age of zircon), a value of 0.0113 for the average continental crust (second stage), and a depleted mantle (DM) 176Lu/177Hf and 176Hf/177Hf of 0.0384 and 0.28325, respectively.
(f) U-Pb age determined by LA-ICP-MS. Data are reported as 238U/206Pb for ages younger than ca. 900 Ma and 207Pb/206Pb for older ages.
